# Supplementary material
Source: PubMed Central journal article supplement (PMC4337885)
Supplement: NIHMS665352-supplement-01.pdf [file NIHMS665352-supplement-01.pdf]

Supplemental Information:

**A.**

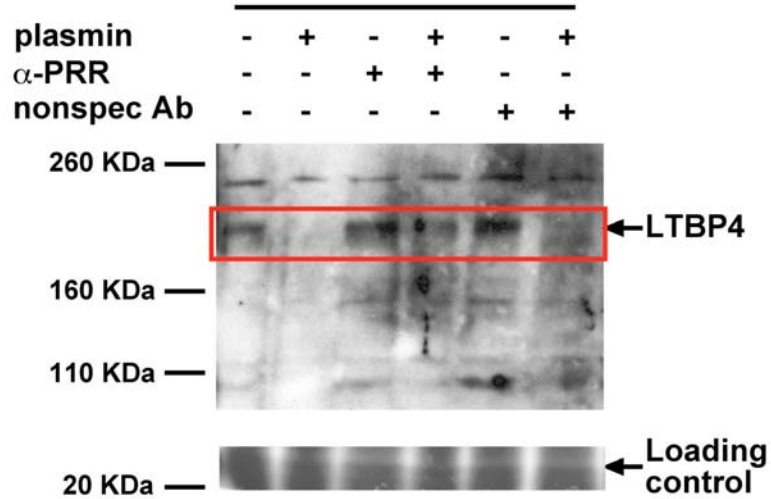

**B.**

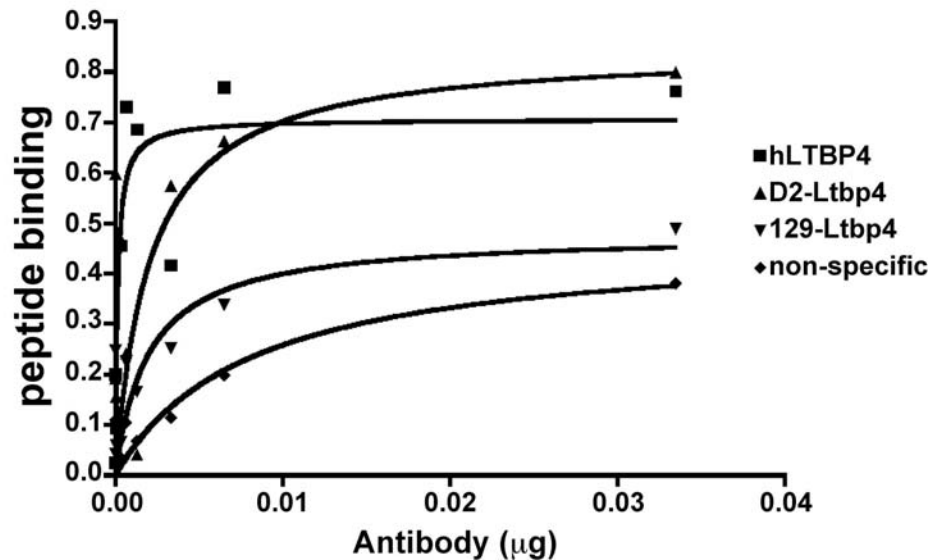

**Fig S1. LTBP4 cleavage is specifically blocked by the anti-PRR antibody.** **A.** Anti-PRR antibody was generated against the human LTBP4 PRR hinge region and was used in the in vitro proteolysis assay. The anti-PRR antibody specifically protects against human LTBP4 proteolysis. The nonspecific antibody does not protect from proteolysis. **B.** ELISA assays showed enhanced binding of the anti-PRR antibody to the human LTBP4 peptide.

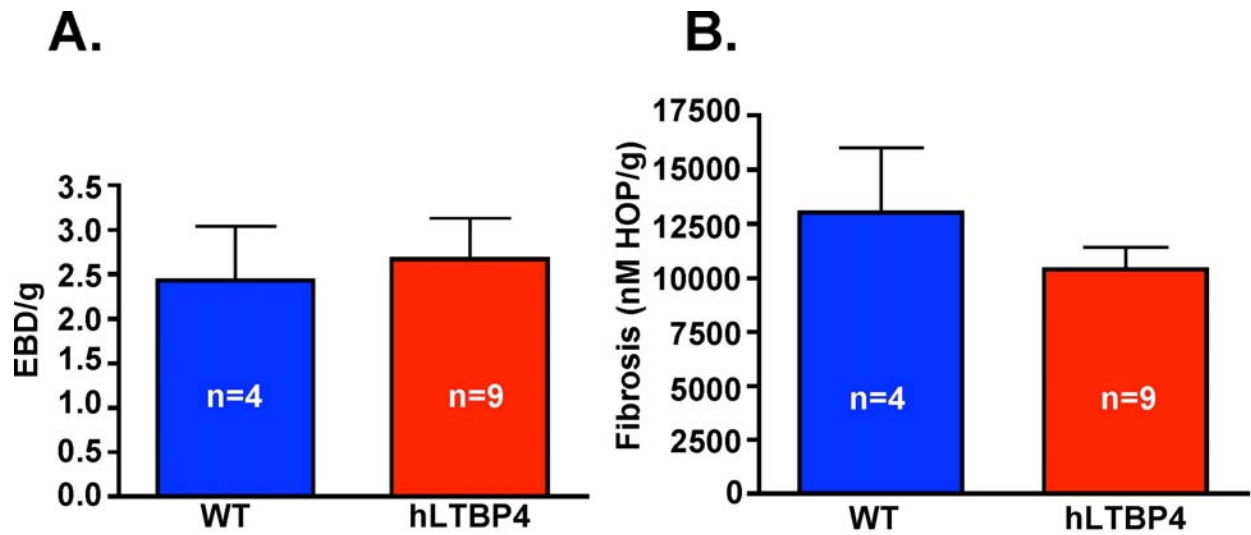

**Fig S2. The BAC transgene does not alter membrane leak and fibrosis.** Evans blue dye and fibrosis is not altered by the presence of the hLTBP4 BAC transgene in the wildtype background.

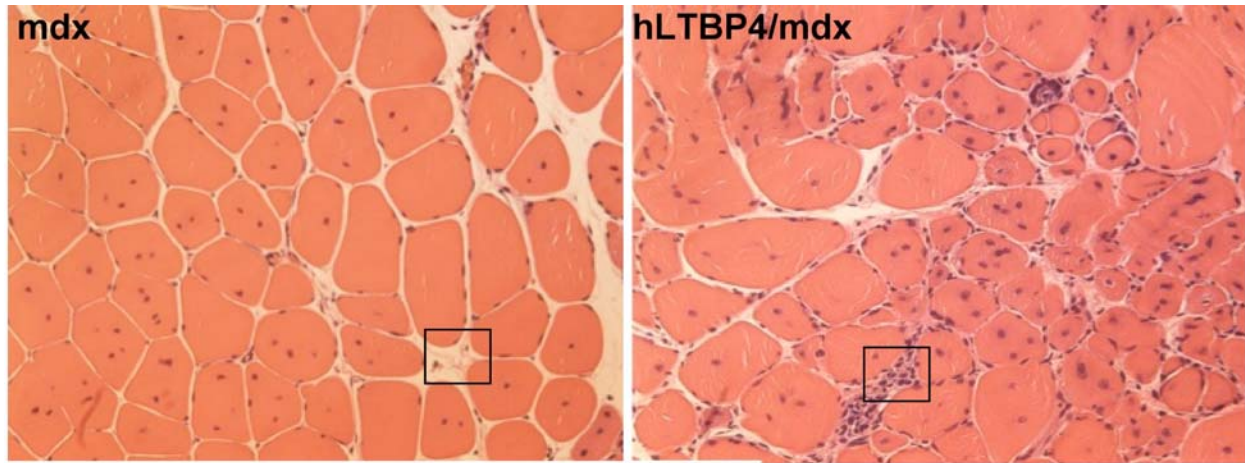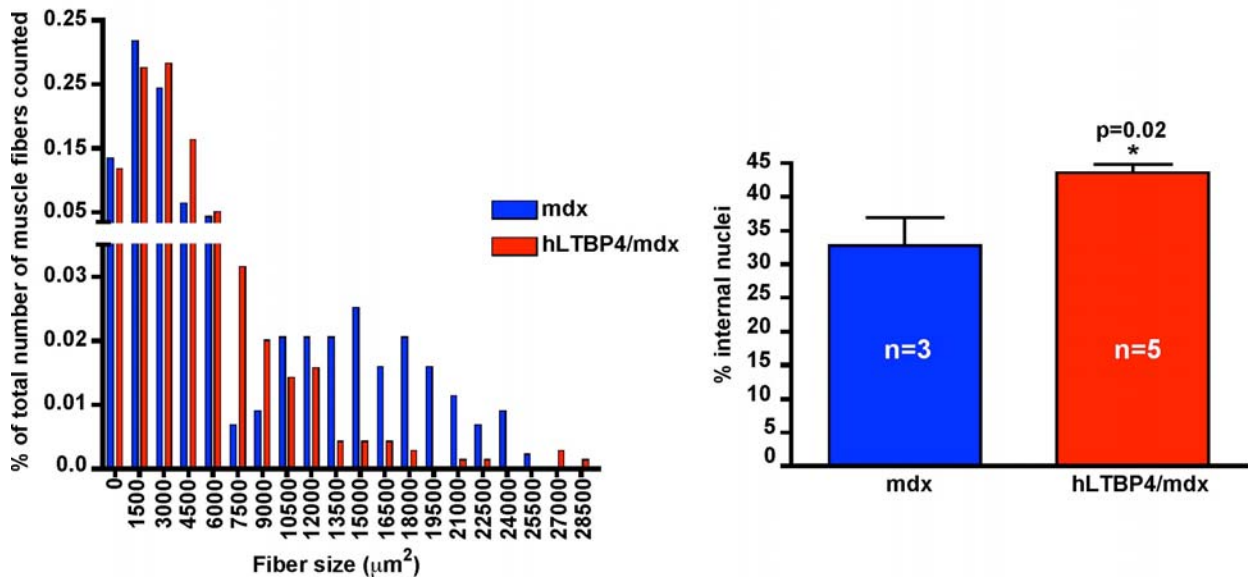

**Fig S3. Human LTBP4 (hLTBP4) expression intensifies *mdx* muscle pathology.** The *hLTBP4* BAC transgene was crossed into *mdx* mice and littermates were compared. **A.** Representative histopathology in *mdx* (left) versus *hLTBP4/mdx* mice (right). H&E staining showed elevated mononuclear cell infiltrate (compare boxed areas), fibrosis, and significantly more centralized nuclei in *hLTBP4/mdx* mice compared to *mdx* littermate controls. *hLTBP4/mdx* mice had fewer large myofibers (left panel) and an increase in centrally nucleated fibers (right panel).

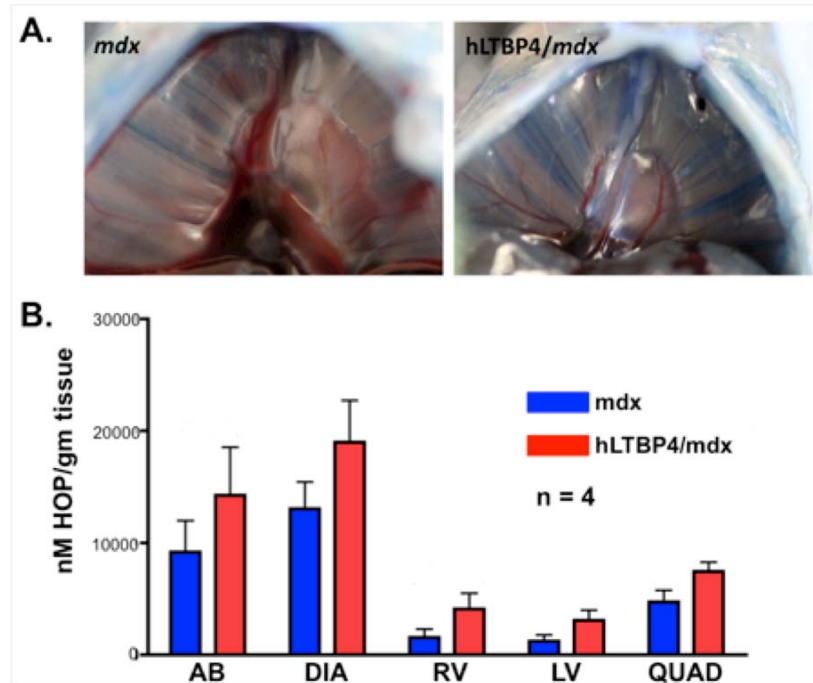

**Fig S4. Multiple muscles are worsened by the hLTBP4 transgene in the *mdx* mouse.** Increased Evans blue dye uptake and increased hydroxyproline content in *hLTBP4/mdx* mice compared to *mdx* mice. **A.** A representative diaphragm muscles from *mdx* and *hLTBP4/mdx* littermates; there is increased visible dye uptake (seen as blue areas) in the *hLTBP4/mdx* diaphragm muscles. **B.** Hydroxyproline content is increased in multiple muscle groups in *hLTBP4/mdx* muscles compared to *mdx* muscles.

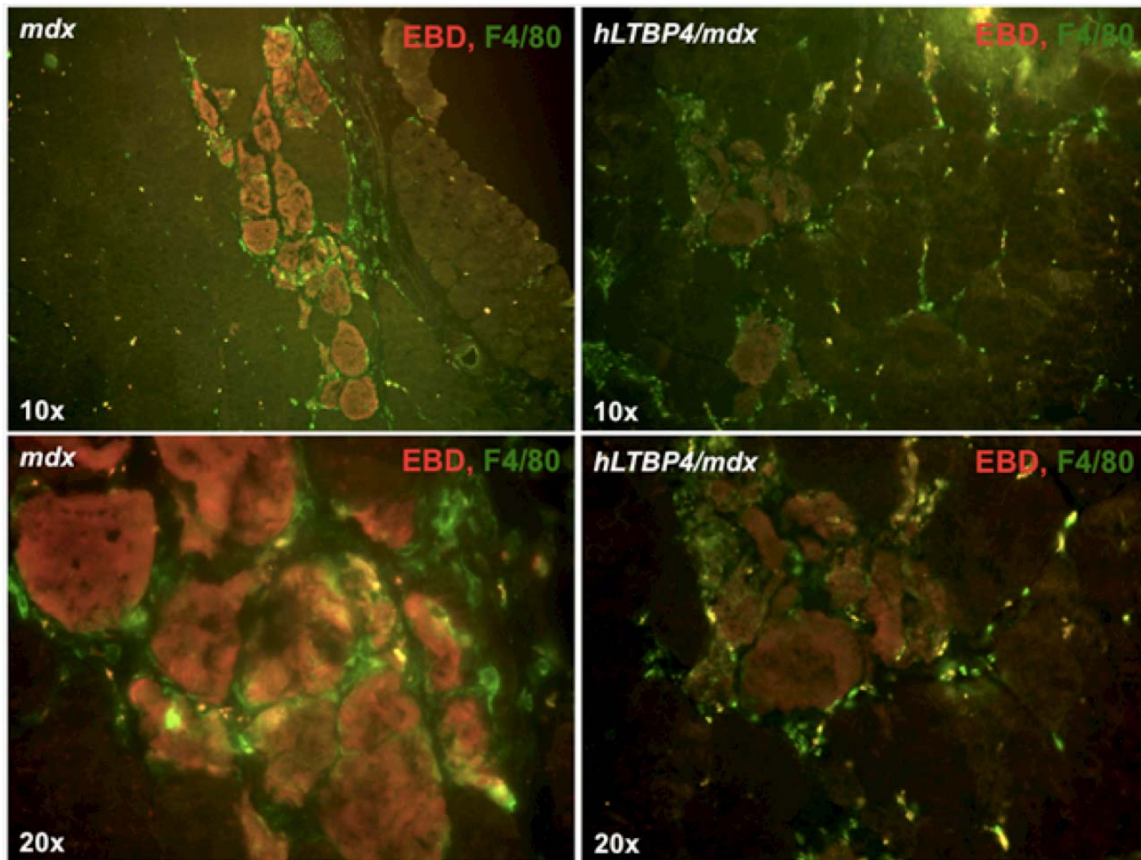

**Fig S5. Increased macrophage infiltration in *hLTBP4/mdx* muscle.** F4/80 staining (green) was used to identify activated macrophages. The distribution of F4/80 staining in *mdx* muscle was largely restricted to Evans blue dye positive areas (seen as red) where green cells clustered at the edges of dye positive fibers. In contrast, F4/80-positive cells were distributed throughout *hLTBP4/mdx* muscle in addition to being found near dye-positive cells.
